# Supplementary material for: Characterization of the Open-Label Lead-In Period of Two Randomized Controlled Phase 3 Trials Evaluating Dapagliflozin, Saxagliptin, and Metformin in Type 2 Diabetes
Source: Springer Nature journal article supplement (doi:10.1007/s13300-018-0445-x), 2018-05-25
Supplement: MOESM1 [file 15792992]

## SUPPLEMENTARY MATERIAL

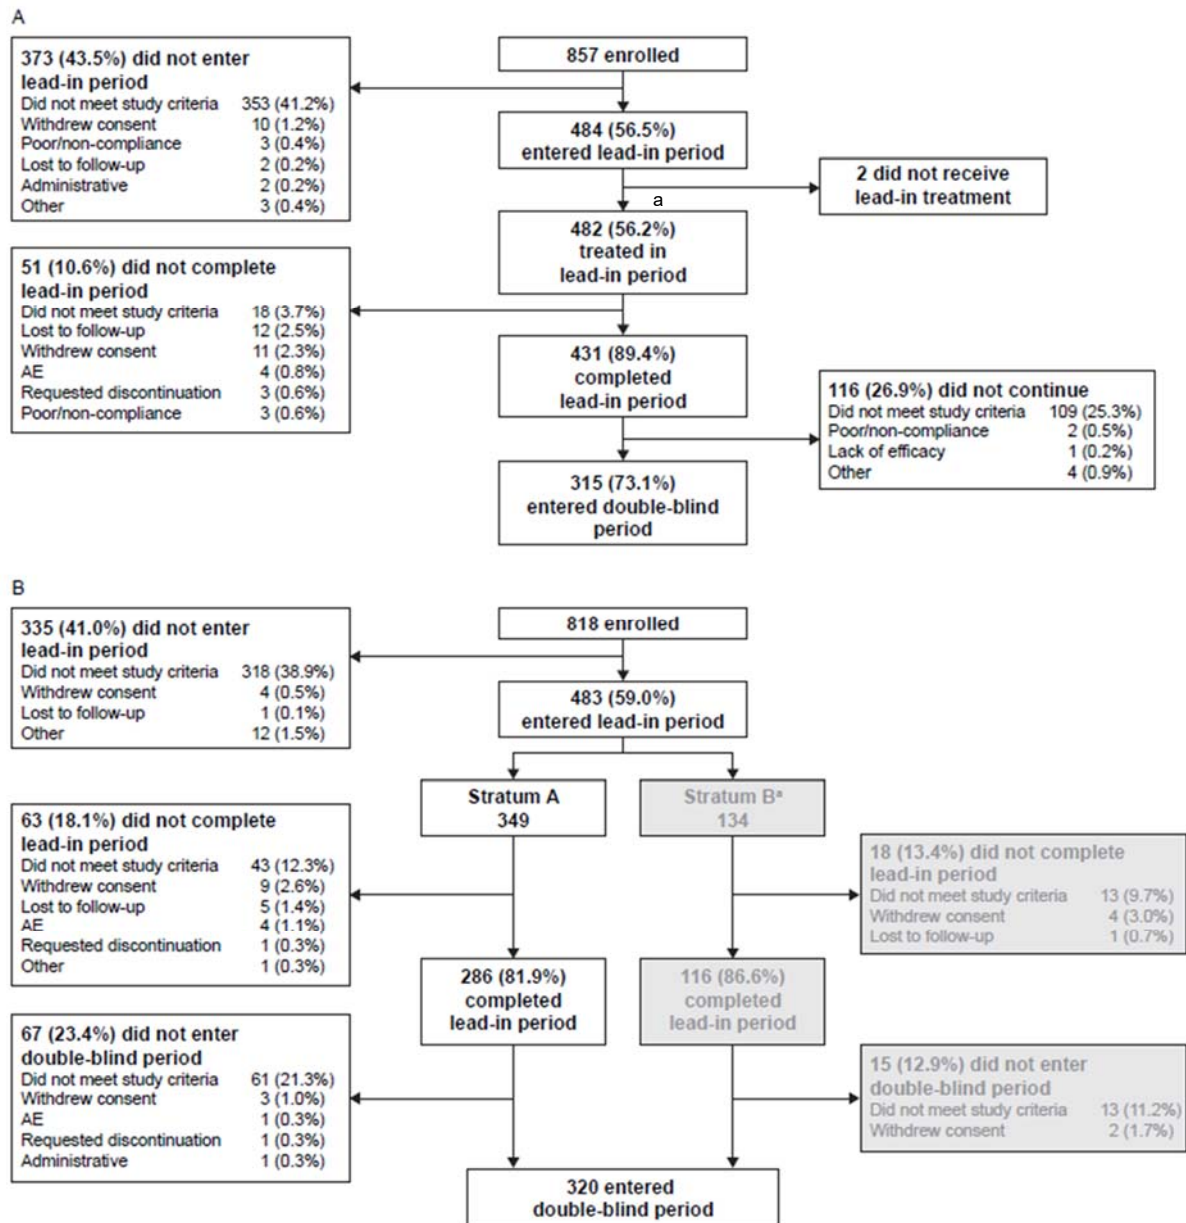

**Fig. S1 Patient disposition during the lead-in periods.**

(A) Study 1; dapagliflozin add-on to metformin lead-in [8]. (B) Study 2; saxagliptin add-on to metformin lead-in [9].

AE, adverse event; DPP-4, dipeptidyl peptidase-4.

<sup>a</sup>Stratum B of study 2 is not included in the analyses of the lead-in period because these patients had previously been receiving DPP-4 inhibitor therapy.
